# Supplementary material for: A Comparison between Dietary Consumption Status and Healthy Dietary Pattern among Adults Aged 55 and Older in China
Source: MDPI journal article supplement (doi:10.3390/nu14132778), 2022-07-05
Supplement: s1 [file s1]

**Table S1.** Food grouping used in the dietary consumption analysis

| <b>food or food groups</b>   | <b>Foods included in the group</b>                                                                                                                                                         |
|------------------------------|--------------------------------------------------------------------------------------------------------------------------------------------------------------------------------------------|
| Rice                         | Cooked white rice, cooked rice with assorted mixtures, and rice-noodle                                                                                                                     |
| Wheat                        | Non-fried noodles (bread, steamed buns, noodles, dumplings)                                                                                                                                |
| Other cereals                | Coarse cereals (corn, barley, sorghum, rye), fried noodles, and instant noodles                                                                                                            |
| Tubers                       | Sweet potato, potato, and taro                                                                                                                                                             |
| Legumes                      | Soybean, and products                                                                                                                                                                      |
| Whole grains and mixed beans | Whole-wheat bread, buckwheat, mung beans, and red beans                                                                                                                                    |
| Vegetables                   | legume vegetables, tomatoes, peppers, melon vegetables, green leafy vegetables, cabbage and other leafy vegetables, cruciferous vegetables, mushroom, alga, dried and fermented vegetables |
| Fruits                       | Orange fruits, melon fruits, berry fruits, all other fresh fruits, and dried or canned fruit                                                                                               |
| Livestock meat               | Pork, beef, lamb, and mutton                                                                                                                                                               |
| Poultry                      | Chicken, duck, goose, pigeon, and quail                                                                                                                                                    |
| Organ and processed meat     | Organ meat, sausage, ham sausage, and luncheon meat                                                                                                                                        |
| Fish and seafood             | Fish, shrimp, crab, and shellfish                                                                                                                                                          |
| Eggs                         | Fresh egg, salted egg, and preserved egg                                                                                                                                                   |
| Dairy products               | Liquid milk, milk powder, yogurt, and cheese                                                                                                                                               |
| Nuts                         | Peanuts, melon seeds, pumpkin seeds, and watermelon seeds                                                                                                                                  |
| Snacks                       | Cakes, cookies, pastries, bread, biscuit, chocolate, chips and other fried snacks                                                                                                          |
| Water and beverage           | No added water or soda, kola, other sugared beverages, strong tea, coffee, and fruit juice                                                                                                 |

**Table S2.** Recommendations of foods derived from Chinese Dietary Guidelines (2022)

| Food or food groups          | Recommendations |            | Unit   |
|------------------------------|-----------------|------------|--------|
|                              | 55-64 years     | >=65 years |        |
| Grain                        | 200~300         | 200~250    | g/day  |
| Whole grains and mixed beans | 50~150          | 50~150     | g/day  |
| Tubers                       | 50~100          | 50~75      | g/day  |
| Legumes                      | 105~175         | 105        | g/week |
| Vegetables                   | 300~500         | 300~450    | g/day  |
| Fruits                       | 200~350         | 200~300    | g/day  |
| Animal Food                  | 120~200         | 120~150    | g/day  |
| livestock and poultry meat   | 280~525         | 280~350    | g/week |
| Fish and seafood             | 280~525         | 280~350    | g/week |
| Eggs                         | 280~350         | 280~350    | g/week |
| Dairy products               | 300             | 300        | g/day  |
| Nuts                         | 50~70           | 50~70      | g/week |
| Edible oil                   | 25~30           | 25~30      | g/day  |
| Salt                         | <5              | <5         | g/day  |

Table S3. Consumption rates of foods by characteristics among Chinese adults aged 55 years and above in four provinces in CCSNSD 2020.<sup>1</sup>

| Characteristics                            | Rice   | Wheat  | Other cereals | Tubers | Whole grains and mixed beans | Vegetables | Fruits | Legumes | Livestock meat | Poultry | Organ and processed meat | Fish and seafood | Eggs   | Dairy products | Nuts   | Snacks | Water and beverage | Edible oil | Salt   |
|--------------------------------------------|--------|--------|---------------|--------|------------------------------|------------|--------|---------|----------------|---------|--------------------------|------------------|--------|----------------|--------|--------|--------------------|------------|--------|
| Gender                                     |        |        |               |        |                              |            |        |         |                |         |                          |                  |        |                |        |        |                    |            |        |
| Male                                       | 95.7   | 88.5   | 72.2          | 80.5   | 43.4                         | 99.5       | 90.0   | 87.9    | 95.0           | 83.1    | 36.1                     | 74.7             | 94.4   | 35.9           | 44.8   | 41.5   | 95.8               | 99.6       | 99.6   |
| Female                                     | 96.1   | 86.3   | 72.9          | 82.3   | 47.5                         | 99.6       | 92.3   | 87.8    | 93.9           | 82.7    | 32.3                     | 75.4             | 94.9   | 41.3           | 47.9   | 44.9   | 96.0               | 99.4       | 99.4   |
| <i>p</i> -Value                            | 0.318  | <0.001 | 0.390         | 0.013  | <0.001                       | 0.517      | <0.001 | 0.864   | 0.014          | 0.543   | <0.001                   | 0.375            | 0.283  | <0.001         | <0.001 | <0.001 | 0.539              | 0.204      | 0.243  |
| Age group (years)                          |        |        |               |        |                              |            |        |         |                |         |                          |                  |        |                |        |        |                    |            |        |
| 55-64                                      | 96.2   | 87.9   | 71.3          | 81.3   | 45.2                         | 99.6       | 92.0   | 87.9    | 95.2           | 84.9    | 35.7                     | 76.5             | 94.6   | 37.7           | 50.4   | 42.7   | 96.0               | 99.6       | 99.7   |
| 65-74                                      | 96.4   | 86.9   | 73.2          | 81.6   | 45.9                         | 99.5       | 91.9   | 88.3    | 94.5           | 83.3    | 34.0                     | 75.5             | 94.6   | 38.8           | 47.3   | 43.1   | 95.8               | 99.3       | 99.3   |
| ≥75                                        | 94.4   | 87.2   | 73.2          | 81.7   | 46.0                         | 99.5       | 89.0   | 86.7    | 92.9           | 79.1    | 31.4                     | 72.3             | 95.1   | 41.3           | 39.4   | 45.1   | 95.9               | 99.4       | 99.4   |
| <i>p</i> -Value                            | 0.001  | 0.893  | 0.072         | 0.689  | 0.467                        | 0.585      | <0.001 | 0.201   | <0.001         | <0.001  | <0.001                   | <0.001           | 0.367  | 0.006          | <0.001 | 0.072  | 0.751              | 0.163      | 0.164  |
| Residential area                           |        |        |               |        |                              |            |        |         |                |         |                          |                  |        |                |        |        |                    |            |        |
| Rural                                      | 94.5   | 87.3   | 70.4          | 78.0   | 43.5                         | 99.2       | 88.0   | 87.0    | 94.2           | 78.3    | 27.4                     | 66.9             | 94.2   | 32.0           | 45.4   | 41.8   | 94.3               | 99.9       | 99.9   |
| Urban                                      | 97.2   | 87.3   | 74.6          | 84.8   | 47.8                         | 99.9       | 94.4   | 88.7    | 94.4           | 87.2    | 40.1                     | 82.9             | 95.2   | 45.6           | 47.6   | 44.9   | 97.4               | 99.0       | 99.0   |
| <i>p</i> -Value                            | <0.001 | 0.967  | <0.001        | <0.001 | <0.001                       | <0.001     | <0.001 | 0.006   | 0.643          | <0.001  | <0.001                   | <0.001           | 0.014  | <0.001         | 0.019  | <0.001 | <0.001             | <0.001     | <0.001 |
| Education level                            |        |        |               |        |                              |            |        |         |                |         |                          |                  |        |                |        |        |                    |            |        |
| Illiteracy                                 | 93.8   | 87.2   | 69.3          | 76.3   | 39.0                         | 99.5       | 86.1   | 84.7    | 92.9           | 79.6    | 29.3                     | 66.8             | 93.5   | 32.1           | 42.0   | 42.3   | 96.3               | 99.4       | 99.3   |
| Primary school and below                   | 96.4   | 85.1   | 72.6          | 83.9   | 46.0                         | 99.6       | 91.6   | 87.7    | 94.0           | 83.9    | 36.4                     | 76.2             | 94.2   | 35.3           | 47.8   | 46.2   | 95.4               | 99.2       | 99.3   |
| Middle school                              | 95.4   | 89.9   | 73.9          | 83.1   | 48.0                         | 99.4       | 92.7   | 89.7    | 95.0           | 83.1    | 31.2                     | 75.1             | 94.9   | 42.6           | 46.2   | 40.0   | 95.1               | 99.6       | 99.6   |
| High school and above                      | 98.2   | 89.1   | 74.7          | 80.0   | 50.6                         | 99.8       | 95.6   | 89.7    | 96.2           | 84.4    | 37.7                     | 83.2             | 97.2   | 52.6           | 49.7   | 42.5   | 97.9               | 99.8       | 99.8   |
| <i>p</i> -Value                            | <0.001 | <0.001 | <0.001        | 0.007  | <0.001                       | 0.498      | <0.001 | <0.001  | <0.001         | <0.001  | <0.001                   | <0.001           | <0.001 | <0.001         | <0.001 | 0.067  | 0.061              | 0.015      | 0.011  |
| Monthly household income per capital (RMB) |        |        |               |        |                              |            |        |         |                |         |                          |                  |        |                |        |        |                    |            |        |
| <1000                                      | 89.8   | 91.8   | 78.7          | 77.3   | 39.2                         | 99.3       | 84.4   | 85.8    | 89.4           | 74.6    | 27.6                     | 60.5             | 94.7   | 32.9           | 38.6   | 39.1   | 94.7               | 98.6       | 98.7   |
| 1000~3999                                  | 96.7   | 88.1   | 70.8          | 82.4   | 46.7                         | 99.5       | 92.1   | 88.3    | 95.0           | 84.1    | 34.5                     | 75.3             | 94.7   | 38.8           | 47.3   | 45.0   | 95.7               | 99.6       | 99.6   |
| ≥4000                                      | 99.4   | 81.1   | 71.5          | 83.2   | 49.1                         | 100.0      | 95.7   | 88.4    | 97.3           | 87.4    | 38.5                     | 87.9             | 94.9   | 45.0           | 52.0   | 43.5   | 97.5               | 99.8       | 99.8   |
| <i>p</i> -Value                            | <0.001 | <0.001 | <0.001        | <0.001 | <0.001                       | <0.001     | <0.001 | 0.006   | <0.001         | <0.001  | <0.001                   | <0.001           | 0.738  | <0.001         | <0.001 | 0.003  | <0.001             | <0.001     | <0.001 |

<sup>1</sup> Values are expressed as % and examined using Chi-Square test or Cochran-Armitage trend test.
